# Supplementary material
Source: publisher figshare collection journal article supplement (https://gsajournals.figshare.com/ndownloader/files/14387606)
Supplement: Supplementary file 1 [file 14387606]

## Sheet: Table S6
Table S6. The removed 627 SNPs with reverse-complement allele designation.
solcap_snp_sl_10196
solcap_snp_sl_10236
solcap_snp_sl_10246
solcap_snp_sl_10377
solcap_snp_sl_10516
solcap_snp_sl_10563
solcap_snp_sl_10569
solcap_snp_sl_10596
solcap_snp_sl_10686
solcap_snp_sl_10796
solcap_snp_sl_10904
solcap_snp_sl_10928
solcap_snp_sl_10946
solcap_snp_sl_10961
solcap_snp_sl_11221
solcap_snp_sl_11232
solcap_snp_sl_11509
solcap_snp_sl_11532
solcap_snp_sl_11539
solcap_snp_sl_11569
solcap_snp_sl_11670
solcap_snp_sl_11736
solcap_snp_sl_11751
solcap_snp_sl_11805
solcap_snp_sl_11982
solcap_snp_sl_12101
solcap_snp_sl_12135
solcap_snp_sl_12261
solcap_snp_sl_12268
solcap_snp_sl_12289
solcap_snp_sl_12372
solcap_snp_sl_12414
solcap_snp_sl_12501
solcap_snp_sl_12664
solcap_snp_sl_12718
solcap_snp_sl_12769
solcap_snp_sl_12841
solcap_snp_sl_12878
solcap_snp_sl_12913
solcap_snp_sl_1295
solcap_snp_sl_13098
solcap_snp_sl_13147
solcap_snp_sl_13193
solcap_snp_sl_13200
solcap_snp_sl_1325
solcap_snp_sl_13398
solcap_snp_sl_1345
solcap_snp_sl_13455
solcap_snp_sl_13464
solcap_snp_sl_13590
solcap_snp_sl_13594
solcap_snp_sl_13604
solcap_snp_sl_13621
solcap_snp_sl_13842
solcap_snp_sl_13958
solcap_snp_sl_14155
solcap_snp_sl_14354
solcap_snp_sl_14415
solcap_snp_sl_14428
solcap_snp_sl_14672
solcap_snp_sl_14759
solcap_snp_sl_14845
solcap_snp_sl_14865
solcap_snp_sl_14874
solcap_snp_sl_1499
solcap_snp_sl_15039
solcap_snp_sl_15173
solcap_snp_sl_1519
solcap_snp_sl_1527
solcap_snp_sl_15289
solcap_snp_sl_15417
solcap_snp_sl_15446
solcap_snp_sl_15515
solcap_snp_sl_15641
solcap_snp_sl_15690
solcap_snp_sl_15728
solcap_snp_sl_15757
solcap_snp_sl_15879
solcap_snp_sl_15885
solcap_snp_sl_16096
solcap_snp_sl_16099
solcap_snp_sl_16133
solcap_snp_sl_16141
solcap_snp_sl_16162
solcap_snp_sl_16196
solcap_snp_sl_16421
solcap_snp_sl_16424
solcap_snp_sl_16499
solcap_snp_sl_16501
solcap_snp_sl_16576
solcap_snp_sl_16579
solcap_snp_sl_16584
solcap_snp_sl_16642
solcap_snp_sl_16650
solcap_snp_sl_16840
solcap_snp_sl_16920
solcap_snp_sl_1701
solcap_snp_sl_17063
solcap_snp_sl_17239
solcap_snp_sl_17289
solcap_snp_sl_17448
solcap_snp_sl_17476
solcap_snp_sl_17496
solcap_snp_sl_17507
solcap_snp_sl_17524
solcap_snp_sl_17536
solcap_snp_sl_17544
solcap_snp_sl_17563
solcap_snp_sl_17581
solcap_snp_sl_17643
solcap_snp_sl_17645
solcap_snp_sl_17649
solcap_snp_sl_17717
solcap_snp_sl_1772
solcap_snp_sl_17751
solcap_snp_sl_17839
solcap_snp_sl_18055
solcap_snp_sl_18057
solcap_snp_sl_1815
solcap_snp_sl_18185
solcap_snp_sl_1819
solcap_snp_sl_18196
solcap_snp_sl_1824
solcap_snp_sl_18256
solcap_snp_sl_1827
solcap_snp_sl_18272
solcap_snp_sl_18306
solcap_snp_sl_18313
solcap_snp_sl_18398
solcap_snp_sl_18634
solcap_snp_sl_18755
solcap_snp_sl_18756
solcap_snp_sl_18757
solcap_snp_sl_18943
solcap_snp_sl_18944
solcap_snp_sl_18949
solcap_snp_sl_18995
solcap_snp_sl_19032
solcap_snp_sl_19513
solcap_snp_sl_19569
solcap_snp_sl_19636
solcap_snp_sl_19643
solcap_snp_sl_19652
solcap_snp_sl_19657
solcap_snp_sl_19660
solcap_snp_sl_19759
solcap_snp_sl_19782
solcap_snp_sl_19899
solcap_snp_sl_19981
solcap_snp_sl_20051
solcap_snp_sl_20064
solcap_snp_sl_20088
solcap_snp_sl_2011
solcap_snp_sl_20228
solcap_snp_sl_20229
solcap_snp_sl_20241
solcap_snp_sl_20256
solcap_snp_sl_20361
solcap_snp_sl_20409
solcap_snp_sl_20499
solcap_snp_sl_20500
solcap_snp_sl_20585
solcap_snp_sl_20719
solcap_snp_sl_20723
solcap_snp_sl_20752
solcap_snp_sl_20809
solcap_snp_sl_20883
solcap_snp_sl_20932
solcap_snp_sl_20936
solcap_snp_sl_20952
solcap_snp_sl_20958
solcap_snp_sl_20981
solcap_snp_sl_20988
solcap_snp_sl_21014
solcap_snp_sl_21039
solcap_snp_sl_21070
solcap_snp_sl_21102
solcap_snp_sl_21280
solcap_snp_sl_21317
solcap_snp_sl_21323
solcap_snp_sl_21363
solcap_snp_sl_21390
solcap_snp_sl_21400
solcap_snp_sl_21401
solcap_snp_sl_21429
solcap_snp_sl_21430
solcap_snp_sl_21456
solcap_snp_sl_21677
solcap_snp_sl_21714
solcap_snp_sl_2172
solcap_snp_sl_21966
solcap_snp_sl_21971
solcap_snp_sl_22017
solcap_snp_sl_221
solcap_snp_sl_22130
solcap_snp_sl_222
solcap_snp_sl_22259
solcap_snp_sl_22594
solcap_snp_sl_22604
solcap_snp_sl_22831
solcap_snp_sl_22839
solcap_snp_sl_22845
solcap_snp_sl_22846
solcap_snp_sl_22858
solcap_snp_sl_22869
solcap_snp_sl_22877
solcap_snp_sl_22878
solcap_snp_sl_22880
solcap_snp_sl_22882
solcap_snp_sl_22889
solcap_snp_sl_22891
solcap_snp_sl_22892
solcap_snp_sl_22894
solcap_snp_sl_22897
solcap_snp_sl_22898
solcap_snp_sl_229
solcap_snp_sl_22906
solcap_snp_sl_22911
solcap_snp_sl_22916
solcap_snp_sl_22917
solcap_snp_sl_22924
solcap_snp_sl_22956
solcap_snp_sl_22957
solcap_snp_sl_22959
solcap_snp_sl_22963
solcap_snp_sl_22973
solcap_snp_sl_22975
solcap_snp_sl_22979
solcap_snp_sl_22986
solcap_snp_sl_22988
solcap_snp_sl_22994
solcap_snp_sl_22996
solcap_snp_sl_23004
solcap_snp_sl_23010
solcap_snp_sl_23011
solcap_snp_sl_23014
solcap_snp_sl_23015
solcap_snp_sl_23020
solcap_snp_sl_23021
solcap_snp_sl_23028
solcap_snp_sl_23044
solcap_snp_sl_23045
solcap_snp_sl_23051
solcap_snp_sl_23055
solcap_snp_sl_23059
solcap_snp_sl_23061
solcap_snp_sl_23062
solcap_snp_sl_23064
solcap_snp_sl_23068
solcap_snp_sl_23088
solcap_snp_sl_23096
solcap_snp_sl_23099
solcap_snp_sl_23145
solcap_snp_sl_23192
solcap_snp_sl_23195
solcap_snp_sl_23344
solcap_snp_sl_234
solcap_snp_sl_23453
solcap_snp_sl_23561
solcap_snp_sl_23591
solcap_snp_sl_23608
solcap_snp_sl_23702
solcap_snp_sl_23734
solcap_snp_sl_23763
solcap_snp_sl_23787
solcap_snp_sl_23811
solcap_snp_sl_23823
solcap_snp_sl_23882
solcap_snp_sl_23975
solcap_snp_sl_24001
solcap_snp_sl_24081
solcap_snp_sl_24251
solcap_snp_sl_24255
solcap_snp_sl_2438
solcap_snp_sl_24383
solcap_snp_sl_24384
solcap_snp_sl_24445
solcap_snp_sl_24560
solcap_snp_sl_24562
solcap_snp_sl_24604
solcap_snp_sl_24609
solcap_snp_sl_24755
solcap_snp_sl_24787
solcap_snp_sl_24973
solcap_snp_sl_24987
solcap_snp_sl_24990
solcap_snp_sl_25015
solcap_snp_sl_25082
solcap_snp_sl_25150
solcap_snp_sl_25167
solcap_snp_sl_25168
solcap_snp_sl_25171
solcap_snp_sl_2518
solcap_snp_sl_25187
solcap_snp_sl_25188
solcap_snp_sl_25195
solcap_snp_sl_25201
solcap_snp_sl_25207
solcap_snp_sl_25208
solcap_snp_sl_25210
solcap_snp_sl_25211
solcap_snp_sl_25213
solcap_snp_sl_25220
solcap_snp_sl_25232
solcap_snp_sl_25236
solcap_snp_sl_25242
solcap_snp_sl_2525
solcap_snp_sl_25251
solcap_snp_sl_25255
solcap_snp_sl_25256
solcap_snp_sl_25258
solcap_snp_sl_25260
solcap_snp_sl_25261
solcap_snp_sl_25262
solcap_snp_sl_25267
solcap_snp_sl_25270
solcap_snp_sl_25277
solcap_snp_sl_25278
solcap_snp_sl_25283
solcap_snp_sl_25296
solcap_snp_sl_25297
solcap_snp_sl_25304
solcap_snp_sl_25305
solcap_snp_sl_25313
solcap_snp_sl_25322
solcap_snp_sl_25336
solcap_snp_sl_25362
solcap_snp_sl_25414
solcap_snp_sl_25429
solcap_snp_sl_25485
solcap_snp_sl_2565
solcap_snp_sl_25696
solcap_snp_sl_25735
solcap_snp_sl_25745
solcap_snp_sl_258
solcap_snp_sl_25879
solcap_snp_sl_25918
solcap_snp_sl_25951
solcap_snp_sl_2604
solcap_snp_sl_26129
solcap_snp_sl_2614
solcap_snp_sl_26438
solcap_snp_sl_26551
solcap_snp_sl_26780
solcap_snp_sl_26791
solcap_snp_sl_2686
solcap_snp_sl_2691
solcap_snp_sl_2695
solcap_snp_sl_2701
solcap_snp_sl_27107
solcap_snp_sl_27162
solcap_snp_sl_27482
solcap_snp_sl_2797
solcap_snp_sl_282
solcap_snp_sl_28295
solcap_snp_sl_28404
solcap_snp_sl_28407
solcap_snp_sl_28409
solcap_snp_sl_28425
solcap_snp_sl_2879
solcap_snp_sl_28826
solcap_snp_sl_28914
solcap_snp_sl_29043
solcap_snp_sl_29326
solcap_snp_sl_29332
solcap_snp_sl_29351
solcap_snp_sl_29357
solcap_snp_sl_29388
solcap_snp_sl_2939
solcap_snp_sl_29394
solcap_snp_sl_29398
solcap_snp_sl_29506
solcap_snp_sl_29549
solcap_snp_sl_29565
solcap_snp_sl_2959
solcap_snp_sl_2971
solcap_snp_sl_2974
solcap_snp_sl_298
solcap_snp_sl_2984
solcap_snp_sl_2990
solcap_snp_sl_29911
solcap_snp_sl_29920
solcap_snp_sl_29932
solcap_snp_sl_29934
solcap_snp_sl_30046
solcap_snp_sl_3008
solcap_snp_sl_301
solcap_snp_sl_30133
solcap_snp_sl_3035
solcap_snp_sl_30380
solcap_snp_sl_30408
solcap_snp_sl_306
solcap_snp_sl_30819
solcap_snp_sl_30911
solcap_snp_sl_3094
solcap_snp_sl_31119
solcap_snp_sl_3112
solcap_snp_sl_31275
solcap_snp_sl_31277
solcap_snp_sl_31280
solcap_snp_sl_3130
solcap_snp_sl_3159
solcap_snp_sl_31671
solcap_snp_sl_31687
solcap_snp_sl_31723
solcap_snp_sl_31730
solcap_snp_sl_31775
solcap_snp_sl_31777
solcap_snp_sl_31884
solcap_snp_sl_31953
solcap_snp_sl_31971
solcap_snp_sl_31973
solcap_snp_sl_31978
solcap_snp_sl_32032
solcap_snp_sl_32093
solcap_snp_sl_32147
solcap_snp_sl_32389
solcap_snp_sl_32425
solcap_snp_sl_32529
solcap_snp_sl_32703
solcap_snp_sl_330
solcap_snp_sl_33136
solcap_snp_sl_33139
solcap_snp_sl_33547
solcap_snp_sl_3355
solcap_snp_sl_33642
solcap_snp_sl_33736
solcap_snp_sl_33817
solcap_snp_sl_33822
solcap_snp_sl_33830
solcap_snp_sl_34143
solcap_snp_sl_34165
solcap_snp_sl_34177
solcap_snp_sl_34186
solcap_snp_sl_34221
solcap_snp_sl_3424
solcap_snp_sl_34253
solcap_snp_sl_34373
solcap_snp_sl_34684
solcap_snp_sl_34742
solcap_snp_sl_34762
solcap_snp_sl_3480
solcap_snp_sl_35063
solcap_snp_sl_35139
solcap_snp_sl_35382
solcap_snp_sl_35693
solcap_snp_sl_357
solcap_snp_sl_35757
solcap_snp_sl_35777
solcap_snp_sl_35779
solcap_snp_sl_360
solcap_snp_sl_36050
solcap_snp_sl_36135
solcap_snp_sl_36141
solcap_snp_sl_36157
solcap_snp_sl_36165
solcap_snp_sl_36203
solcap_snp_sl_36224
solcap_snp_sl_36548
solcap_snp_sl_36568
solcap_snp_sl_36725
solcap_snp_sl_37054
solcap_snp_sl_37057
solcap_snp_sl_37198
solcap_snp_sl_3723
solcap_snp_sl_37399
solcap_snp_sl_37400
solcap_snp_sl_3746
solcap_snp_sl_37808
solcap_snp_sl_38
solcap_snp_sl_3849
solcap_snp_sl_3853
solcap_snp_sl_38945
solcap_snp_sl_38987
solcap_snp_sl_3924
solcap_snp_sl_39725
solcap_snp_sl_3980
solcap_snp_sl_39868
solcap_snp_sl_39959
solcap_snp_sl_3997
solcap_snp_sl_4016
solcap_snp_sl_4024
solcap_snp_sl_4029
solcap_snp_sl_4034
solcap_snp_sl_4055
solcap_snp_sl_4099
solcap_snp_sl_4121
solcap_snp_sl_42919
solcap_snp_sl_42933
solcap_snp_sl_42942
solcap_snp_sl_42961
solcap_snp_sl_43
solcap_snp_sl_43894
solcap_snp_sl_43920
solcap_snp_sl_44932
solcap_snp_sl_4518
solcap_snp_sl_47660
solcap_snp_sl_48910
solcap_snp_sl_48911
solcap_snp_sl_4926
solcap_snp_sl_4932
solcap_snp_sl_49752
solcap_snp_sl_5050
solcap_snp_sl_5051
solcap_snp_sl_50871
solcap_snp_sl_5094
solcap_snp_sl_5095
solcap_snp_sl_5103
solcap_snp_sl_5113
solcap_snp_sl_5115
solcap_snp_sl_51601
solcap_snp_sl_5179
solcap_snp_sl_521
solcap_snp_sl_5256
solcap_snp_sl_5266
solcap_snp_sl_5268
solcap_snp_sl_52783
solcap_snp_sl_5280
solcap_snp_sl_53
solcap_snp_sl_53173
solcap_snp_sl_535
solcap_snp_sl_53552
solcap_snp_sl_53870
solcap_snp_sl_53877
solcap_snp_sl_54547
solcap_snp_sl_55020
solcap_snp_sl_55037
solcap_snp_sl_55409
solcap_snp_sl_5547
solcap_snp_sl_55475
solcap_snp_sl_55514
solcap_snp_sl_55837
solcap_snp_sl_55906
solcap_snp_sl_5791
solcap_snp_sl_5795
solcap_snp_sl_5800
solcap_snp_sl_5807
solcap_snp_sl_58447
solcap_snp_sl_5875
solcap_snp_sl_58920
solcap_snp_sl_59437
solcap_snp_sl_5973
solcap_snp_sl_6003
solcap_snp_sl_6022
solcap_snp_sl_60360
solcap_snp_sl_6038
solcap_snp_sl_6051
solcap_snp_sl_60513
solcap_snp_sl_6073
solcap_snp_sl_60831
solcap_snp_sl_6086
solcap_snp_sl_6092
solcap_snp_sl_6112
solcap_snp_sl_61192
solcap_snp_sl_6152
solcap_snp_sl_6186
solcap_snp_sl_6226
solcap_snp_sl_62495
solcap_snp_sl_6255
solcap_snp_sl_62616
solcap_snp_sl_62666
solcap_snp_sl_62695
solcap_snp_sl_6370
solcap_snp_sl_63704
solcap_snp_sl_6372
solcap_snp_sl_64263
solcap_snp_sl_64662
solcap_snp_sl_6524
solcap_snp_sl_65244
solcap_snp_sl_6526
solcap_snp_sl_65262
solcap_snp_sl_6568
solcap_snp_sl_65880
solcap_snp_sl_66569
solcap_snp_sl_67010
solcap_snp_sl_67119
solcap_snp_sl_67772
solcap_snp_sl_67805
solcap_snp_sl_6902
solcap_snp_sl_69255
solcap_snp_sl_69262
solcap_snp_sl_69276
solcap_snp_sl_6934
solcap_snp_sl_69429
solcap_snp_sl_7042
solcap_snp_sl_7045
solcap_snp_sl_7046
solcap_snp_sl_70737
solcap_snp_sl_70781
solcap_snp_sl_7123
solcap_snp_sl_7322
solcap_snp_sl_75
solcap_snp_sl_7737
solcap_snp_sl_7816
solcap_snp_sl_7940
solcap_snp_sl_8064
solcap_snp_sl_8120
solcap_snp_sl_8121
solcap_snp_sl_8464
solcap_snp_sl_8514
solcap_snp_sl_8526
solcap_snp_sl_8659
solcap_snp_sl_8697
solcap_snp_sl_8795
solcap_snp_sl_8813
solcap_snp_sl_9125
solcap_snp_sl_9136
solcap_snp_sl_9235
solcap_snp_sl_9260
solcap_snp_sl_9292
solcap_snp_sl_9447
solcap_snp_sl_9512
solcap_snp_sl_9513
solcap_snp_sl_9531
solcap_snp_sl_9533
solcap_snp_sl_9536
solcap_snp_sl_9546
solcap_snp_sl_9550
solcap_snp_sl_9558
solcap_snp_sl_9560
solcap_snp_sl_9690
solcap_snp_sl_9751
solcap_snp_sl_9752
solcap_snp_sl_9798
solcap_snp_sl_9814
solcap_snp_sl_9816
solcap_snp_sl_9832
